# Supplementary material for: Highly dispersed platinum and phosphomolybdic acid (PMo) on the UiO-66 metal–organic framework (MOF) for highly efficient and selective hydrogenation of nitroaromatics
Source: Royal Society of Chemistry journal article supplement (doi:10.1039/d4ta03635b), 2024-01-01
Supplement: d4ta03635b1.pdf [file d4ta03635b1.pdf]

## Supplementary Information

### **Highly dispersed platinum and phosphomolybdic acid (PMo) on the UiO-66 metal-organic framework (MOF) for highly efficient and selective hydrogenation of nitroaromatics**

Kai Chen <sup>1</sup>, Qingqing Liu <sup>1</sup>, Zhiying Qiu, Huan Zhang, Ning Gong, Lihua Zhu \*

Jiangxi Province Key Laboratory of Functional Crystalline Materials Chemistry, College of Chemistry and Chemical Engineering, Faculty of Materials Metallurgy and Chemistry, Jiangxi University of Science and Technology, Ganzhou 341000, Jiang Xi, China. Email: zhulihua@jxust.edu.cn

**Table S1.** Catalytic performance of the reported catalysts in the literature for nitroarenes hydrogenation

| Reference | Substrate            | Catalyst                              | Solvent          | T<br>(°C) | P(H <sub>2</sub> )<br>(MPa) | t<br>(h) | S<br>(%) | Y<br>(%) | TOF<br>(h <sup>-1</sup> ) |
|-----------|----------------------|---------------------------------------|------------------|-----------|-----------------------------|----------|----------|----------|---------------------------|
| 1         | nitrobenzene         | Co <sub>3</sub> S <sub>4</sub> /CN    | methanol         | 60        | 3.0                         | 3        | >99      | >98      | -                         |
| 2         | nitrobenzene         | Pd@P(QP-TVP)                          | H <sub>2</sub> O | 40        | 1.0                         | 1        | 100      | 98.6     | 986                       |
| 3         | nitrobenzene         | Co@NC-800                             | ethanol          | 110       | 3.0                         | 3.0      | 99       | >98      | 24 <sup>a</sup>           |
| 3         | 2-chloronitrobenzene | Co@NC-800                             | ethanol          | 110       | 3.0                         | 4        | >99      | 98       | -                         |
| 3         | p-nitrobenzonitrile  | Co@NC-800                             | ethanol          | 110       | 3.0                         | 4        | >99      | 96       | -                         |
| 3         | 4-nitrobenzaldehyde  | Co@NC-800                             | ethanol          | 110       | 3.0                         | 6        | >99      | 96       | -                         |
| 4         | p-chloronitrobenzene | Ir-CoO <sub>x</sub> @SiO <sub>2</sub> | ethanol          | 45        | 0.1                         | 1.75     | 98.2     | 97.5     | -                         |
| 4         | p-bromonitrobenzene  | Ir-CoO <sub>x</sub> @SiO <sub>2</sub> | ethanol          | 45        | 0.1                         | 1.75     | 98.8     | 97.3     | -                         |
| 4         | p-iodonitrobenzene   | Ir-CoO <sub>x</sub> @SiO <sub>2</sub> | ethanol          | 45        | 0.1                         | 2        | 100      | 99.7     | -                         |
| 4         | p-nitrophenol        | Ir-CoO <sub>x</sub> @SiO <sub>2</sub> | ethanol          | 45        | 0.1                         | 2.75     | 100      | 86.4     | -                         |
| 4         | p-nitroacetophenone  | Ir-CoO <sub>x</sub> @SiO <sub>2</sub> | ethanol          | 45        | 0.1                         | 0.75     | 100      | 99.1     | -                         |
| 5         | 3-nitrostyrene       | PtSn@mSiO <sub>2</sub>                | toluene          | 80        | 2.0                         | 9        | >99      | >98      | 676                       |
| 6         | 3-nitrostyrene       | CoNi@C                                | toluene          | 120       | 0.7                         | 0.58     | >97      | >92      | -                         |
| 7         | nitrobenzene         | Ni-N-C <sub>60</sub>                  | ethanol          | 80        | 1.0                         | 0.33     | 99.9     | 99.5     | 1656                      |
| This Work | 1, 3-dinitrobenzene  | 0.32%Pt-PMo@UiO-66                    | toluene          | 40        | 3.0                         | 1.5      | 100      | 96.7     | 1708.8                    |

T-reaction temperature; P-reaction pressure; t-reaction time; S-Selectivity to the target product of only one -NO<sub>2</sub> group hydrogenation; Y-Yield to the target product of only one -NO<sub>2</sub> group hydrogenation; TOF-turnover frequency; <sup>a</sup>TON-moles of nitrobenzene consumed divided by total moles of cobalt.

The used 0.32%Pt-PMo@UiO-66 catalyst has been characterized by XRD and XPS. The results are added in Fig. S1 and Fig. S2. As shown in Fig. S1, the structure and phase of the used 0.32%Pt-PMo@UiO-66 catalyst are basically unchanged. It also proves that the catalyst structure has excellent stability. The XPS characterization results of the used 0.32%Pt-PMo@UiO-66 are displayed in Fig. S2. It can be seen from Fig. S2a that there are three XPS fitting peaks of the C-C, C-O, and O-C=O species, with the binding energy of 284.8 eV, 286.2 eV and 288.7 eV (C 1s), respectively. The Zr 3d, Mo 3d and Pt 4f XPS results are shown in Fig. S2b-d. In general, the binding energy of Zr, Pt and Mo corresponding species are slightly changed, which may be caused by much electrons transferring between Pt and Mo, and some oxidation state Pt species being reduced during the reaction.

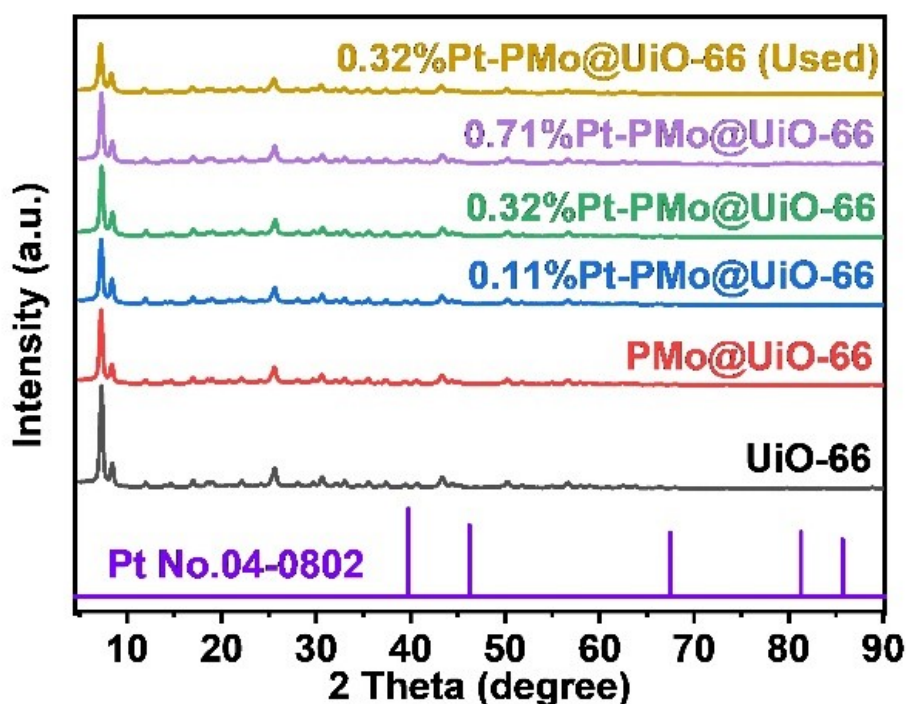

Fig. S1. XRD patterns of different samples.

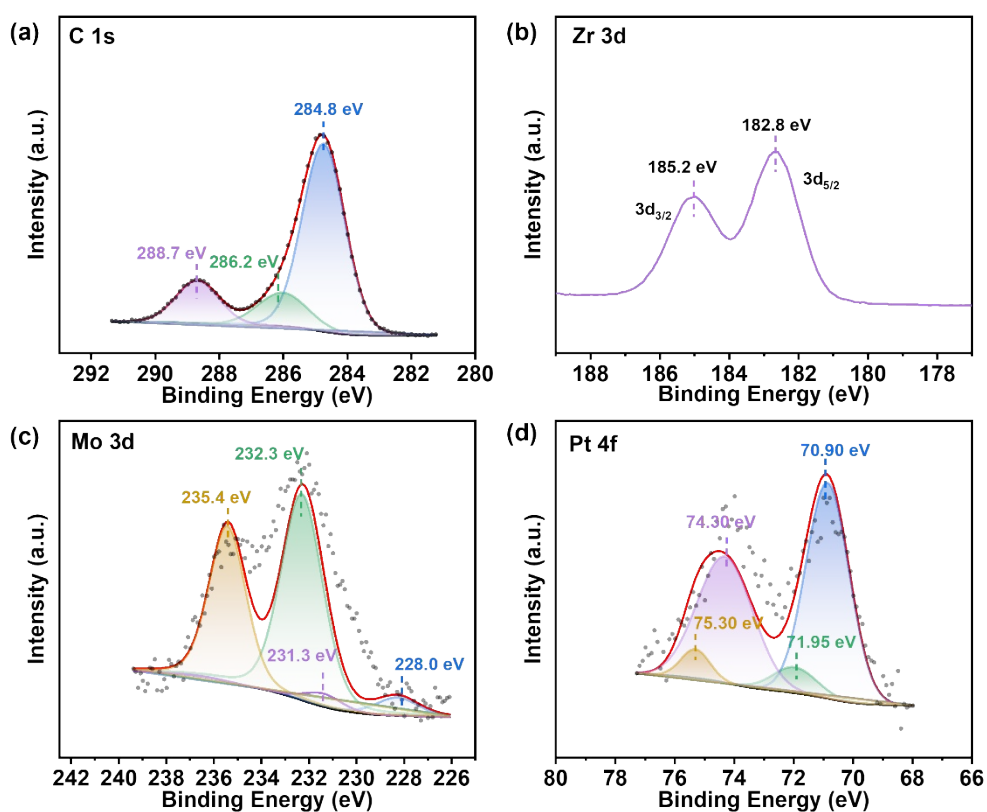

**Fig. S2.** (a) C 1s, (b) Zr 3d, (c) Mo 3d and (d) Pt 4f XPS spectra of the used 0.32%Pt-PMo@UiO-66 catalyst.

## References

- 1 S. Yang, L. Peng, D. Sun, E. Oveisi and S. Bulut, *ChemSusChem*, 2018, **11**, 3131-3138.
- 2 Y. Lei, Z. Chen, G. Lan, R. Wang and X.-Y. Zhou, *New J. Chem.*, 2020, **44**, 3681.
- 3 X. Sun, A. Olivos-Suarez, L. Oar-Arteta, E. Rozhko, D. Osadchii, A. Bavykina, F. Kapteijn and J. Gascon, *ChemCatChem*, 2017, **9**, 1854–1862.
- 4 S. Wang, C. Wu, H. Yu, T. Li, X. Yan and H. Yin, *ACS Appl. Mater. Interfaces*, 2020, **12**, 9966–9976.
- 5 Y. Pei, Z. Qi, T. Goh, L.-L. Wang, R. Maligal-Ganesh, H. MacMurdo, S. Zhang, C. Xiao, X. Li, F. Tao, D. Johnson and W. Huang, *J. Catal.*, 2017, **356**, 307–314.
- 6 L. Liu, F. Gao, P. Concepción and A. Corma, *J. Catal.*, 2017, **350**, 218–225.
- 7 Y. Qu and T. Chen, *Chem. Eng. J.*, 2020, **382**, 122911.
